# Supplementary material
Source: PubMed Central journal article supplement (PMC6026397)

**Biophysical Journal, Volume 114**

**Supplemental Information**

**Gating Currents in the Hv1 Proton Channel**

**Victor De La Rosa and Ian Scott Ramsey**

## SUPPLEMENTARY FIGURE LEGENDS

### **Supplementary Figure 1. Effect of varying voltage prepulse duration on $I_{TAIL}$ -V and $Q_{ON}$ -V relations in W207A-N214R.**

**A)** The absolute value of  $I_{TAIL}$  measured at  $V_{TAIL} = -90$  mV after  $V_{STEP}$  for the indicated duration to voltages between  $-60$  mV and  $+50$  mV ( $V_{STEP}$ :  $-60$  mV, red circles;  $-50$  mV, orange circles;  $-40$  mV, yellow circles;  $-30$  mV, olive circles;  $-20$  mV, green circles;  $-10$  mV, aqua circles;  $0$  mV, cyan circles;  $+10$  mV, blue circles;  $+20$  mV, indigo circles;  $+30$  mV, violet circles;  $+40$  mV, black circles;  $+50$  mV, gray circles) in a representative cell expressing W207A-N214R is shown. Solid lines represent fits to a single exponential function ( $-60$  mV:  $\tau = 102.5$  ms, red line;  $-50$  mV:  $\tau = 155.6$  ms, orange line;  $-40$  mV,  $\tau = 301.3$  ms, yellow line;  $-30$  mV,  $\tau = 355.3$  ms, olive line;  $-20$  mV,  $\tau = 236.4$  ms, green line;  $-10$  mV,  $\tau = 153.2$  ms, aqua line;  $0$  mV,  $\tau = 102.4$  ms, cyan line;  $+10$  mV,  $\tau = 73.3$  ms, blue line;  $+20$  mV,  $\tau = 52.9$  ms, indigo line;  $+30$  mV,  $\tau = 37.4$  ms, violet line;  $+40$  mV,  $\tau = 27.1$  ms, black line;  $+50$  mV,  $\tau = 21$  ms, gray line). Note that the Legend applies to panels A and B.

**B)**  $Q_{ON}$  in the same cell as shown in panel A is measured at  $V_{STEP} = +100$  mV after  $V_{PP}$  for the indicated duration to voltages between  $-70$  mV and  $+40$  mV ( $V_{PP}$ :  $-70$  mV, magenta circles;  $-60$  mV, red circles;  $-50$  mV, orange circles;  $-40$  mV, yellow circles;  $-30$  mV, olive circles;  $-20$  mV, green circles;  $-10$  mV, aqua circles;  $0$  mV, cyan circles;  $+10$  mV, blue circles;  $+20$  mV, indigo circles;  $+30$  mV, violet circles;  $+40$  mV, black circles). Solid lines represent fits to a single exponential function ( $-70$  mV:  $\tau = 2.4 \times 10^8$  ms, magenta line;  $-60$  mV:  $\tau = 407.6$  ms, red line;  $-50$  mV:  $\tau = 333.5$  ms, orange line;  $-40$  mV,  $\tau = 365.5$  ms, yellow line;  $-30$  mV,  $\tau = 273.1$  ms, olive line;  $-20$  mV,  $\tau = 161.1$  ms, green line;  $-10$  mV,  $\tau = 105.4$  ms, aqua line;  $0$  mV,  $\tau = 64.3$  ms, cyan line;  $+10$  mV,  $\tau = 43.1$  ms, blue line;  $+20$  mV,  $\tau = 28.7$  ms, indigo line;  $+30$  mV,  $\tau = 20.9$  ms, violet line;  $+40$  mV,  $\tau = 19.5$  ms, black line).

**C, D)** Linear leak-subtracted  $I_{TAIL}$ -V (**C**) or  $Q_{ON}$ -V (**D**) relations are normalized to their respective maxima and plotted in function of  $V_{STEP}$  or  $V_{PP}$  duration (50 ms, red circles; 100 ms, blue triangles; 200 ms, magenta triangles; 500 ms, green diamonds; 1000 ms, indigo triangles; 2000 ms, violet triangles).

**E, F)**  $V_{0.5}$  (**E**) and  $z_G$  (**F**) values determined from Boltzmann fits to  $I_{TAIL}$ -V (black stars; see panel **C**) or  $Q_{ON}$ -V (red stars; see panel **C**) relations are shown in function of  $V_{PP}$  (for  $Q_{ON}$ ) or  $V_{STEP}$  (for  $I_{TAIL}$ ) duration. Solid lines in panel **E** represent fits to a double exponential function of the form  $V_{0.5} = V_{0.5(0)} + A_1 \cdot e^{t/\tau_1} + A_2 \cdot e^{t/\tau_2}$  (red line:  $Q_{ON}$ :  $V_{0.5(0)} = -44.7$  mV,  $A_1 = 136$  mV,  $\tau_1 = 20.6$  ms,  $A_2 = 29.8$  mV,  $\tau_2 = 310.4$  ms; black line,  $I_{TAIL}$ :  $V_{0.5(0)} = -34.4$  mV,  $A_1 = 142.1$  mV,  $\tau_1 = 21.3$  ms,  $A_2 = 50.6$  mV,  $\tau_2 = 211.8$  ms). Solid lines in panel **F** represent fits to a single exponential function of the form  $z_G = z_{G(0)} + A \cdot e^{t/\tau}$  (red line:  $Q_{ON}$ :  $z_{G(0)} = 2.3 e_0$ ,  $A = -1.5 e_0$ ,  $\tau = 260.3$  ms; black line,  $I_{TAIL}$ :  $z_{G(0)} = 3.2 e_0$ ,  $A = -2.3 e_0$ ,  $\tau = 261.5$  ms).

### Supplementary Figure 2. Steady-state $I_{STEP}$ -V relations in W207A-N214R.

**A, B)** Representative currents elicited by the indicated double-pulse voltage protocols (**A**: to measure  $I_G$  at +140 mV; **B**: to measure  $I_{TAIL}$  at -90 mV) in a cell expressing R205A-N214R are shown. *Inset* shows outward transient current attributed to  $I_G$  at higher resolution.

**C)** Normalized mean ( $\pm$  SEM)  $I_{TAIL}$ -V and  $Q_{ON}$ -V relations expressing R205A-N214R are shown ( $n = 3$  cells). Mean  $V_{0.5}$ ,  $z_G$  and  $V_M$  values are reported in Table 1.

**D)** Plots of maximal  $Q_{ON}$  ( $Q_{ON\ max}$ ) vs. maximal  $I_{TAIL}$  ( $I_{TAIL\ max}$ ) measured in individual cells expressing R205A-N214R (filled red circles), W207A-N214R data (Figure 3) is shown for comparison. Linear fit to the data: slope 2.5 pC/nA;  $R^2 = 0.93$ .

**E)** The number of channels ( $N$ ) is calculated as described in Fig. 3. Linear fit to the data yield an estimate of the unitary conductance.

### Supplementary Figure 3.

**A)** Representative currents in a representative cell expressing W207A-N214R- $\Delta$ C elicited by the indicated voltage step protocol ( $V_{\text{HOLD}} = -80$  mV;  $V_{\text{STEP}} = 50$  mV for 0 to 200 ms in 5 ms intervals;  $V_{\text{TAIL}} = -90$  mV) are shown.

**B)**  $I_{\text{TAIL}}$  activation time courses determined from experiments like that shown in panel **A** are measured over the range of  $V_{\text{STEP}}$  indicated by the legend are shown. Data are fit to a single exponential without a delay (see *Methods*).

**C)**  $I_{\text{STEP}}$  elicited by a voltage step to +50 mV (black line; data from panel **A**) is shown together with the fitted  $I_{\text{TAIL}}$  activation time course (red line; data from panel **B**) scaled to the amplitude of the steady-state  $I_{\text{STEP}}$ .

**D)**  $I_{\text{STEP}}$  at various  $V_{\text{STEP}}$  is determined after subtraction of a scaled exponential fit to the  $I_{\text{TAIL}}$  activation timecourse measured at the indicated  $V_{\text{STEP}}$ , as shown in panel **C** for data at +50 mV.

**E)**  $Q_{\text{ON}}-V$  relation resulting from integrating the subtracted  $I_{\text{STEP}}$  records (panel **D**) is shown (solid black squares). A Boltzmann fit of the data yields parameters ( $V_{0.5} = -33.5$  mV;  $z_G = 1.81 e_0$ ) that are similar to values reported for the  $Q_{\text{ON}}-V$  relation in W207A-N214R obtained without subtraction of the fitted and scaled  $I_{\text{TAIL}}$  timecourse (Table 1).

**F)** The decaying phase of subtracted  $I_{\text{STEP}}$  records (panel **D**) are fit to a single exponential function without a delay (see *Methods*) and the fitted time constant ( $\tau_{\text{DEACT}}$ ) from is shown in function of  $V_{\text{STEP}}$  (open black squares).

#### **Supplementary Figure 4.**

**A, B)** Representative currents in a cell expressing W207A-N214R are elicited by the indicated double-pulse voltage protocols at  $\text{pH}_O$  6.5 (**A**) and  $\text{pH}_O$  5.5 (**B**).  $I_G$  is measured at +50 mV (**A**) or +90 mV (**B**) and  $I_{\text{TAIL}}$  (square symbols) is measured at -90 mV (**A**) or -50 mV (**B**).

**C)**  $I_{\text{STEP}}-V$  relations from  $n = 9$  (pH<sub>o</sub> 6.5, open black squares) or  $n = 4$  (pH<sub>o</sub> 5.5, filled red squares) experiments are linear leak-subtracted and normalized to the amplitude of the maximal inward current; the mean ( $\pm$  SEM) values are plotted in function of  $V_{\text{STEP}}$ .

W207A-N214R

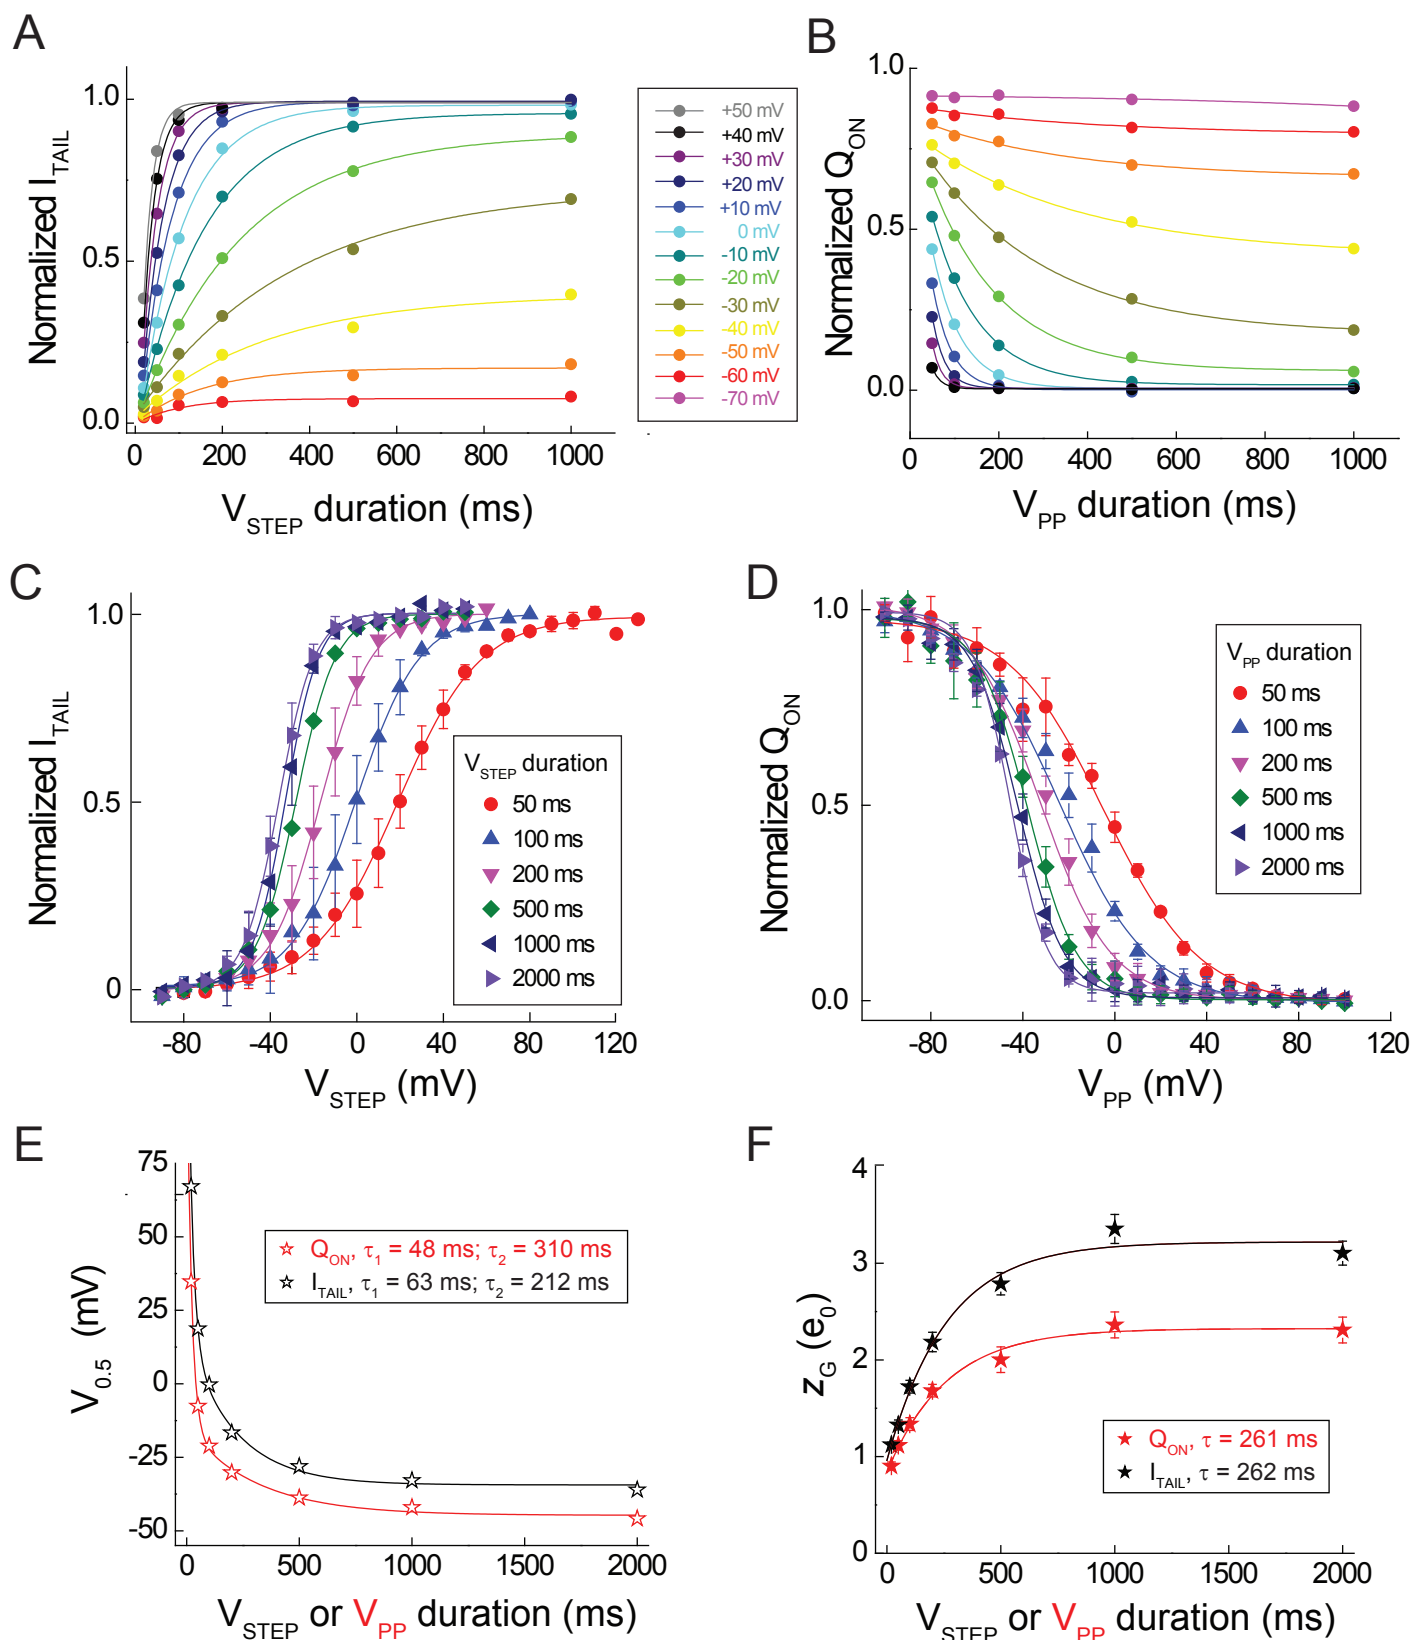

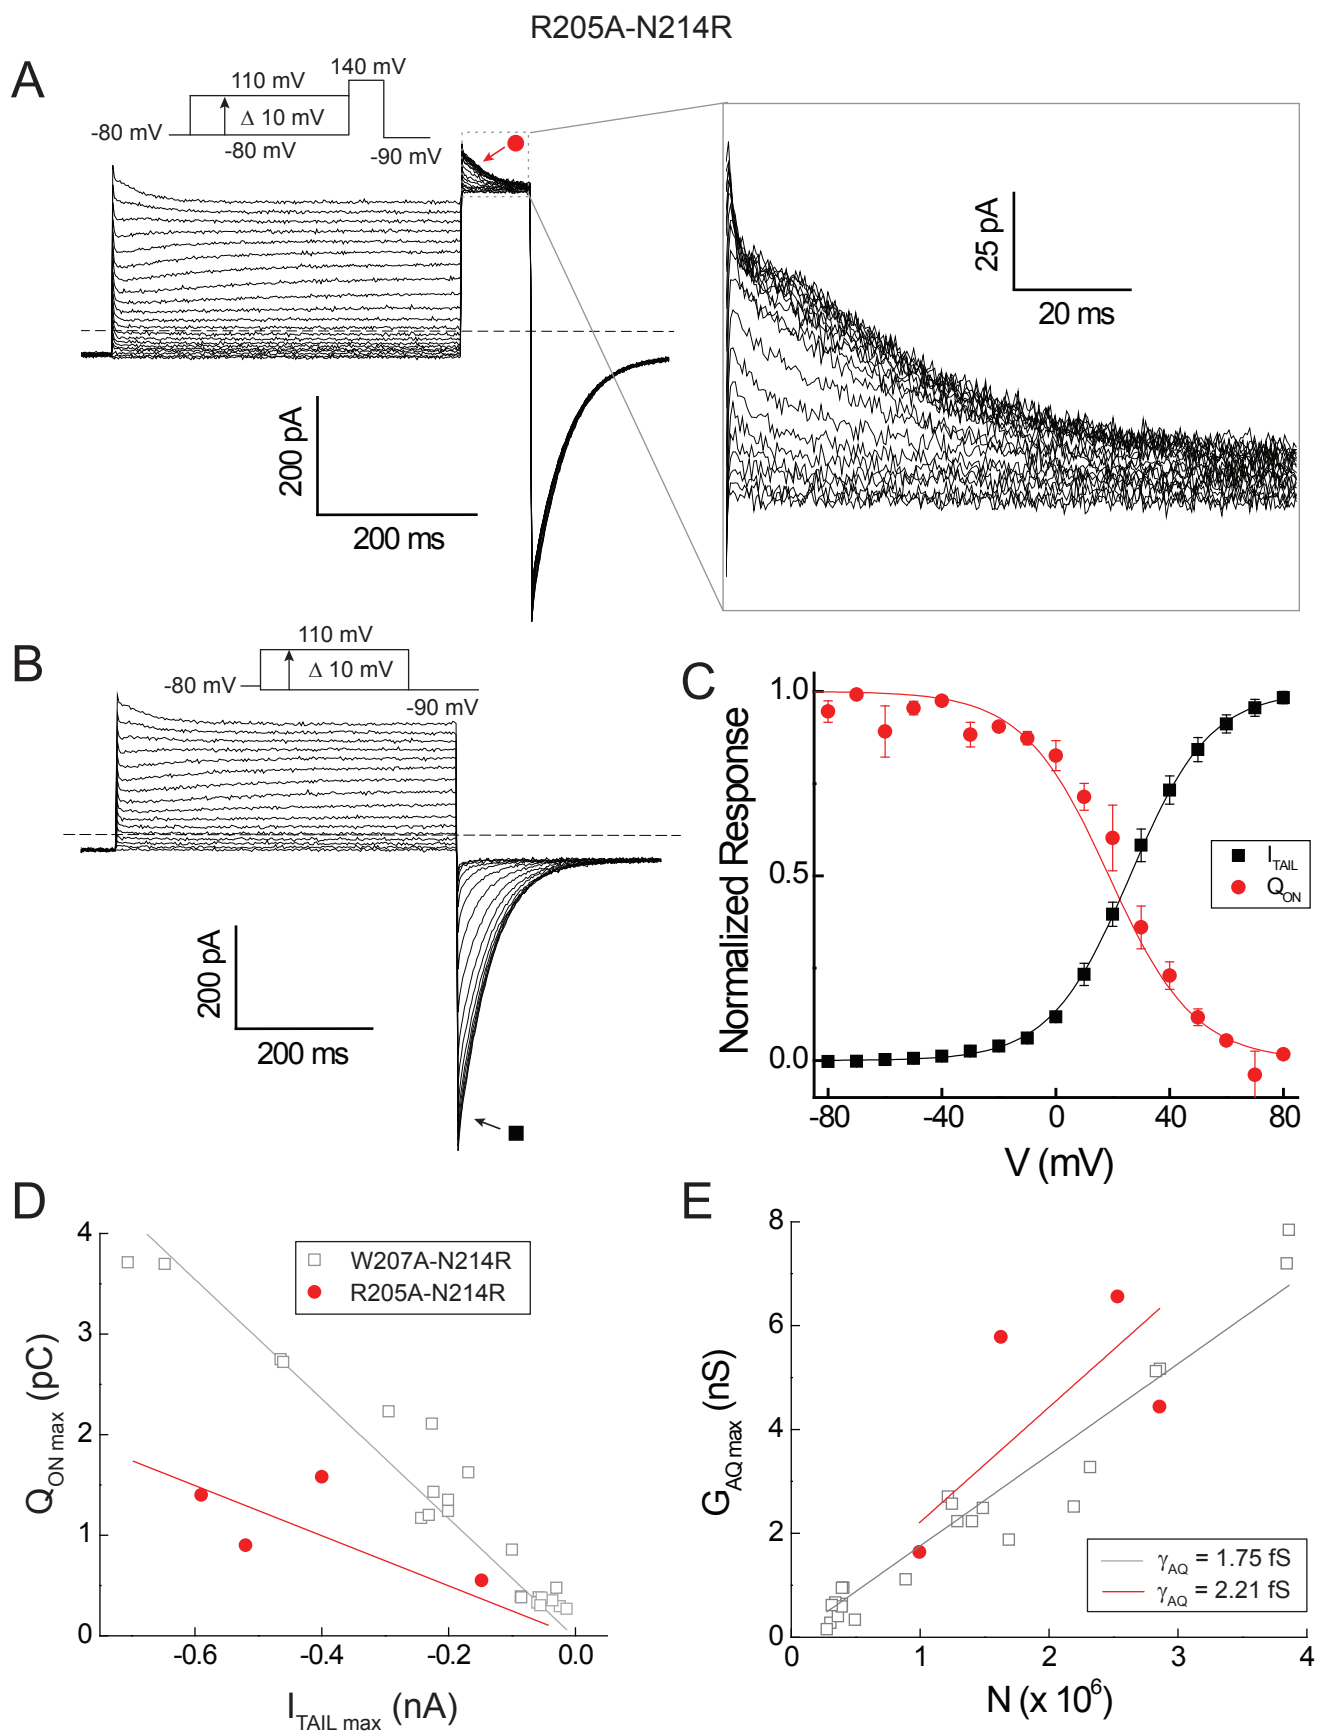

Figure S3

W207A-N214R- $\Delta$ C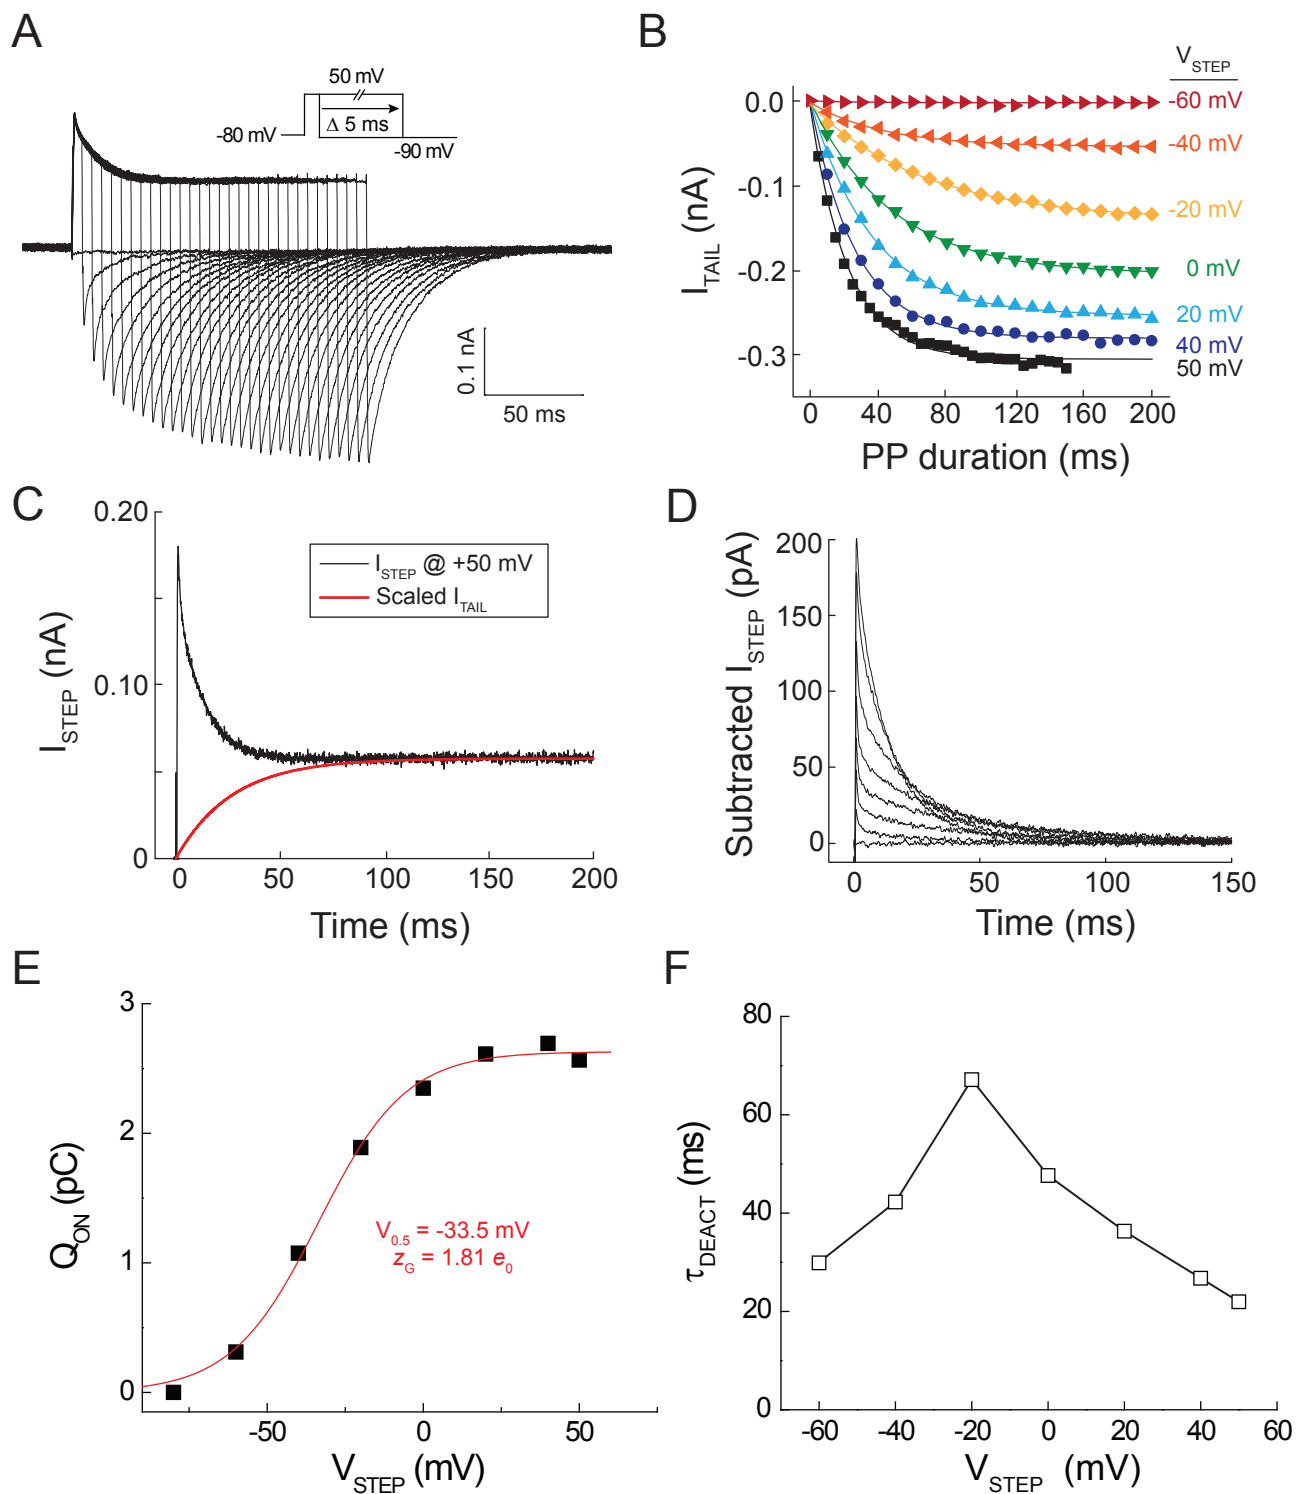



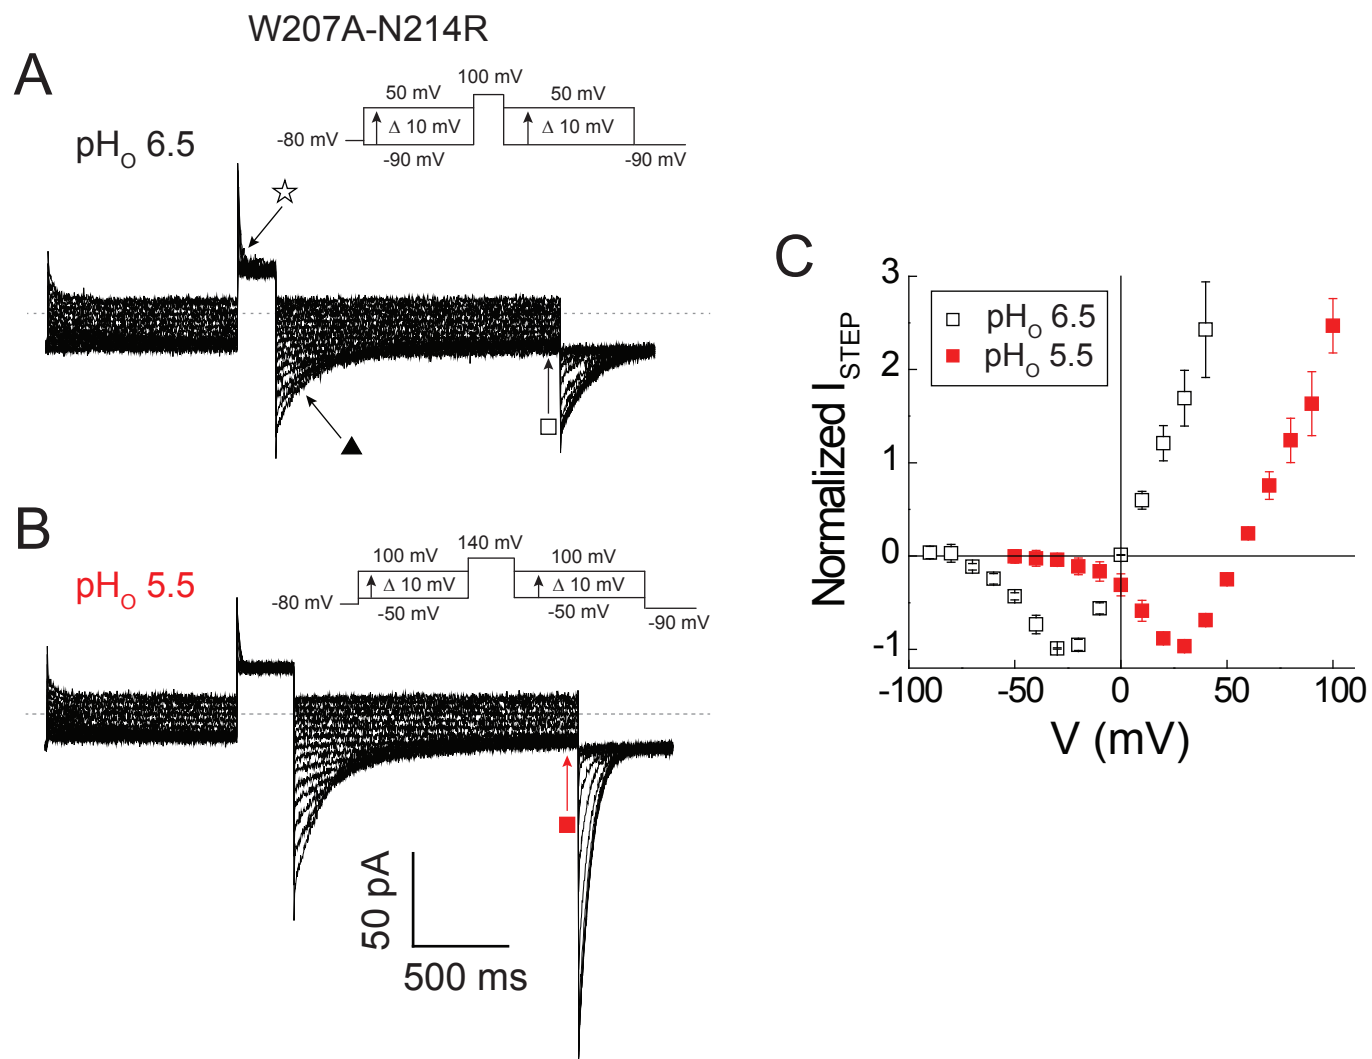

Supplement: mmc1.pdf [file mmc1.pdf]
